# Supplementary figures and images for: First‐in‐human study demonstrating the safety and clinical efficacy of novel anti‐IL‐17A monoclonal antibody CJM112 in moderate to severe plaque psoriasis
Source: PubMed Central journal article supplement — J Eur Acad Dermatol Venereol. 2021 Jan 5;35(5):1143–51. doi: 10.1111/jdv.17071 (PMC8246720; doi:10.1111/jdv.17071), 2021-01-05

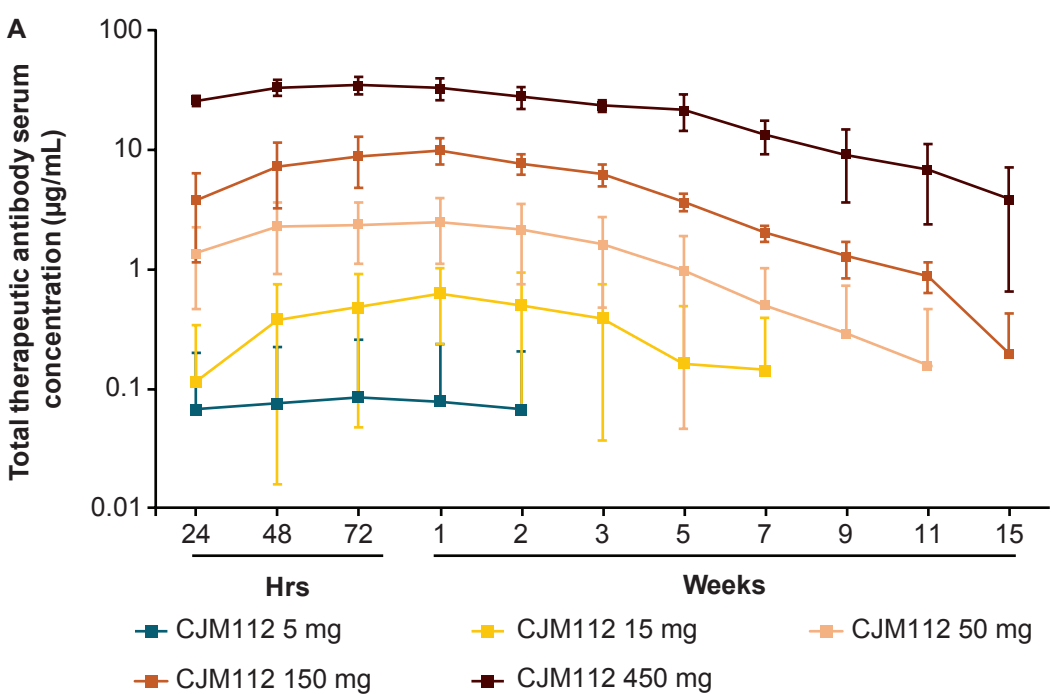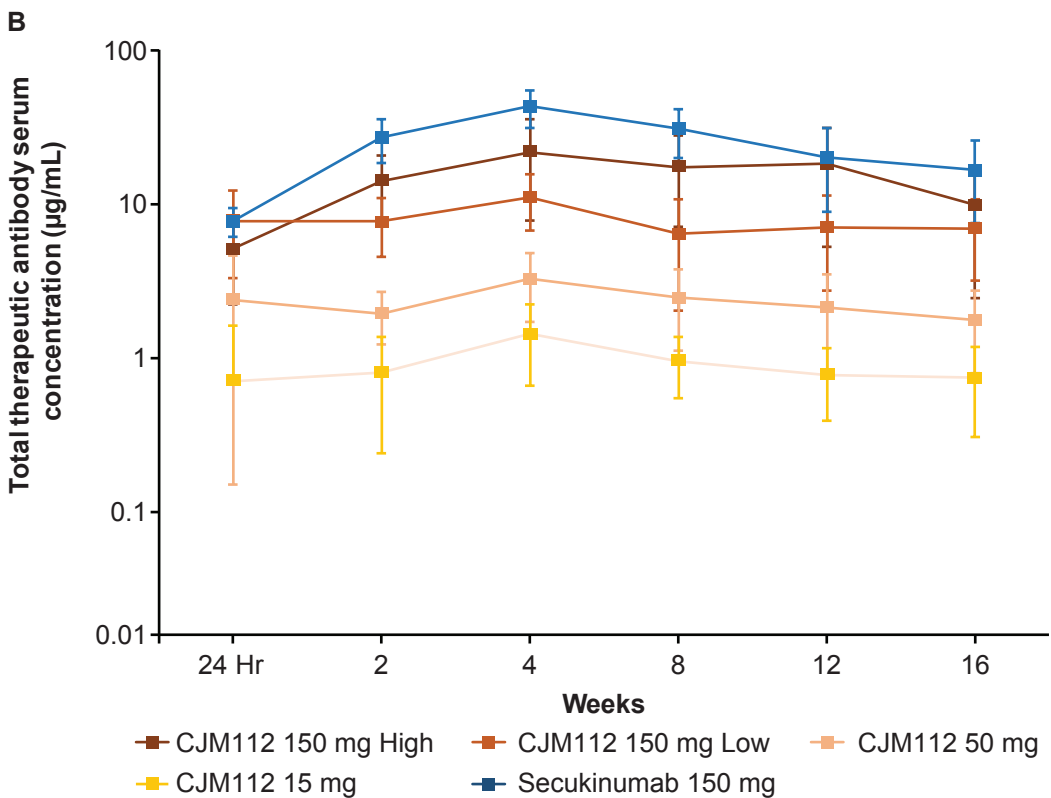

Supplement: JDV-35-1143-s001.pdf [file JDV-35-1143-s001.pdf]
